# Supplementary material for: A Narrative Review on the Human Health Effects of Ambient Air Pollution in Sub-Saharan Africa: An Urgent Need for Health Effects Studies
Source: Preprints.org preprint supplement (doi:10.20944/preprints201801.0058.v1), 2018-01-08
Supplement: Supplementary file 1 [file supplementary]

Table S1. Tabular summary of studies that met the inclusion criteria.

| Title and author                                                                                                                                           | Year | Country              | Time frame | Type                                                                           | Study Population                                                           | Health Outcome/s                                                                                                                                         | Exposure variables                                                   | Statistical Analysis                                  | Key findings                                                                                                                                   | Assessed for interaction with socioeconomic or other risk factors? | Multi-pollutant models?                                                                  | Controlled for indoor fuel use? |
|------------------------------------------------------------------------------------------------------------------------------------------------------------|------|----------------------|------------|--------------------------------------------------------------------------------|----------------------------------------------------------------------------|----------------------------------------------------------------------------------------------------------------------------------------------------------|----------------------------------------------------------------------|-------------------------------------------------------|------------------------------------------------------------------------------------------------------------------------------------------------|--------------------------------------------------------------------|------------------------------------------------------------------------------------------|---------------------------------|
| <b>Acute respiratory symptoms associated with short term fluctuations in ambient pollutants among schoolchildren in Durban, South Africa; Mentz et al.</b> | 2017 | Durban, South Africa | Not given  | Longitudinal panel study of children from different schools followed over time | N = 423 school children, 44% African, 23% mixed race, 28% Indian, 6% white | Acute respiratory – cough, wheeze, shortness of breath, chest tightness/heaviness, any symptoms; outcomes ascertained with daily logs recorded bi-hourly | PM10, SO2, NO2, NO measured at 8 monitoring sites and at each school | GEE; 0 – 5 day lags; single lags and distributed lags | PM10 - ↑ cough, ↑ SOB, ↑ chest; SO2 - ↑ cough, ↑ SOB, ↑ chest; NO2 - ↑ cough, ↑ wheeze, ↑ SOB, ↑ chest; NO - ↑ cough, ↓ wheeze, ↑ SOB, ↑ chest | No                                                                 | Yes, but bi-pollutant model results not presented due to problems from multicollinearity | No                              |
| <b>Ambient pollution and respiratory outcomes among schoolchildren in Durban, South Africa;</b>                                                            | 2013 | Durban, South Africa | Not given  | Cross-sectional study of children from different schools                       | N = 341 school children, 41% black, 22% coloured, 26% Indian, 11% white    | Chronic – cough, phlegm, bronchitis, wheezing, wheezing + SOB, Stuffy/runny nose, watery/itchy eyes, asthma,                                             | PM10, SO2, NO2, NO measured at 8 monitoring sites and at each school | Logistic regression                                   | SO2 - ↑ airway hyperreactivity, No associations between pollutants and other outcomes                                                          | No                                                                 | No                                                                                       | No                              |

|                                                                                                                                                   |      |                                                              |           |                                   |            |                                                       |                                                                                        |                                                |                                    |                                                                                 |    |     |
|---------------------------------------------------------------------------------------------------------------------------------------------------|------|--------------------------------------------------------------|-----------|-----------------------------------|------------|-------------------------------------------------------|----------------------------------------------------------------------------------------|------------------------------------------------|------------------------------------|---------------------------------------------------------------------------------|----|-----|
| Naidoo et al.                                                                                                                                     |      |                                                              |           |                                   |            | airway hyperreactivity                                |                                                                                        |                                                |                                    |                                                                                 |    |     |
| <b>Ambient PM2.5 and Stroke Effect Modifiers and Population Attributable Risk in Six Low- and Middle-Income Countries; Lin et al.</b>             | 2017 | <b>South Africa, Ghana</b> ,<br>China, India, Mexico, Russia | 2007-2010 | Cross-sectional/household surveys | N = 45,625 | Stroke – based on self-report over the past 12-months | PM2.5 – yearly averages derived from satellite-derived aerosol optical depth estimates | Logistic regression – 3-level multilevel model | PM2.5 - ↑ stroke in past 12 months | Yes – sex, age, smoking*, physical activity*, fruit* and vegetable* consumption | No | Yes |
| <b>Exposure to air pollution and tobacco smoking and their combined effects on depression in six low- and middle-income countries. Lin et al.</b> | 2017 | <b>South Africa, Ghana</b> ,<br>China, India, Mexico, Russia | 2007-2010 | Cross-sectional/household surveys | N = 41,785 | Depression                                            | PM2.5 – yearly averages derived from satellite-derived aerosol optical depth estimates | Logistic regression – 3-level multilevel model | PM2.5 - ↑ depression               | Yes – smoking*                                                                  | No | Yes |
| <b>Exposure to ambient PM2.5 associated with overall and domain-specific</b>                                                                      | 2017 | <b>South Africa, Ghana</b> ,<br>China, India, Mexico         | 2007-2010 | Cross-sectional/household surveys | N = 45,625 | Disability Score                                      | PM2.5 – yearly averages derived from satellite-derived                                 | Linear regression – 3-level multilevel model   | PM2.5 - ↑ Disability Score         | No                                                                              | No | Yes |

|                                                                                                                                                                 |      |                         |           |                                                                  |                                                                      |                                                                                                       |                                                                        |                                               |                                                                                                                                                             |                                                                |    |    |
|-----------------------------------------------------------------------------------------------------------------------------------------------------------------|------|-------------------------|-----------|------------------------------------------------------------------|----------------------------------------------------------------------|-------------------------------------------------------------------------------------------------------|------------------------------------------------------------------------|-----------------------------------------------|-------------------------------------------------------------------------------------------------------------------------------------------------------------|----------------------------------------------------------------|----|----|
| disability among adults in six low- and middle-income countries; Lin et al.                                                                                     |      | o, Russia               |           |                                                                  |                                                                      |                                                                                                       | aerosol optical depth estimates                                        |                                               |                                                                                                                                                             |                                                                |    |    |
| <b>Ambient Air Pollution Exposure and Respiratory, Cardiovascular and Cerebrovascular Mortality in Cape Town, South Africa: 2001–2006; Wichmann &amp; Voyi.</b> | 2012 | Cape Town, South Africa | 2001-2006 | Case-crossover using mortality data from local municipal records | N = 149,667 (respiratory disease = 13,439; CVD = 21,569; CBD = 7,594 | Mortality – respiratory disease (RD); cardiovascular disease (CVD); and cerebrovascular disease (CBD) | NO2, SO2, and PM10 measured daily at three government monitoring sites | Logistic regression; tested zero – 5-day lags | NO2 – ↑ CVD; SO2 – ↑ CVD; PM10 – ↑ CBD; NO2 – ↑ CBD; PM10 – ↑ RD (warm temps); NO2 – ↑ RD (warm temps); PM10 – ↑ CVD (warm temps); NO2 – ↑ CBD (warm temps) | Yes – seasonal temperatures, sex, age, distance from monitors* | No | No |
| <b>The effects of air pollution on human mortality: does gender difference matter in African countries?; Aliyu &amp; Ismail.</b>                                | 2016 | 35 African countries    | 1995-2011 | Longitudinal, population-based panel study (ecological)          | Not given                                                            | Mortality rate – stratified by male and female adults, infants, and under-5 mortality                 | PM10 and CO2 emissions per capita (source of these data were not well  | Generalized method of moment regression       | PM10 - ↑ male and female adult mortality and ↑ infant and under-5 mortality; CO2 - ↑ male and female                                                        | Yes – sex and government effectiveness                         | No | No |

|                                                                                                                                                     |      |                                                                                                                                                |                            |                                 |                                                     |                                                                                                                          |                                                                                                                                                                                                                          |                                         |                                                                                                                        |    |                                                                                      |     |
|-----------------------------------------------------------------------------------------------------------------------------------------------------|------|------------------------------------------------------------------------------------------------------------------------------------------------|----------------------------|---------------------------------|-----------------------------------------------------|--------------------------------------------------------------------------------------------------------------------------|--------------------------------------------------------------------------------------------------------------------------------------------------------------------------------------------------------------------------|-----------------------------------------|------------------------------------------------------------------------------------------------------------------------|----|--------------------------------------------------------------------------------------|-----|
|                                                                                                                                                     |      |                                                                                                                                                |                            |                                 |                                                     |                                                                                                                          | describe<br>d)                                                                                                                                                                                                           |                                         | adult<br>mortality<br>and ↑<br>infant and<br>under-5<br>mortality                                                      |    |                                                                                      |     |
| <b>Traffic Air Pollution and Other Risk Factors for Respiratory Illness in Schoolchildren in the Niger-Delta Region of Nigeria; Mustapha et al.</b> | 2011 | Nigeria<br>a<br>municipalities:<br>Warri,<br>Ebrumede,<br>Effurun,<br>jeddoo,<br>Ubeji,<br>Otor-Udu,<br>Owhrode,<br>Ovu,<br>Udu,<br>and<br>Edu | March –<br>June<br>2004    | Cross-sectional<br>survey study | N =<br>1,397<br>schoolchildren (7<br>– 14<br>years) | Wheeze (past<br>12 months);<br>Night cough<br>(past 12<br>months);<br>Phlegm;<br>Rhinitis;<br>Asthma (ever<br>diagnosed) | PM (of<br>various<br>size<br>fractions<br>) and<br>CO.<br>Note:<br>exposure<br>metric<br>based<br>on a<br>principal<br>component<br>analysis<br>that<br>combined<br>air<br>measurements<br>with<br>traffic<br>indicators | Logistic<br>regression                  | Component<br>1 (traffic<br>pollution) -<br>↑ phlegm;<br>Component<br>3 (fine<br>particulates<br>/trucks) - ↑<br>phlegm | No | Yes –<br>use of<br>PCA<br>may<br>constitute<br>a<br>multi-<br>pollutant<br>framework | Yes |
| <b>Outdoor respirable particulate matter and the lung function status</b>                                                                           | 2014 | Ibadan,<br>Nigeria                                                                                                                             | January –<br>March<br>2008 | Cross-sectional<br>study        | N = 140,<br>ages 15-<br>65 years                    | FEV1 observed<br>and %<br>predicted FEV1<br>as determined<br>by observed<br>FEV1/predicted<br>FEV1                       | PM10                                                                                                                                                                                                                     | Spearman<br>rank<br>correlation<br>test | PM10 - ↑<br>FEV1<br>(observed)                                                                                         | No | No                                                                                   | No  |

|                                                                                                                     |      |                              |                   |                                       |                                  |                                             |                                                                                                                                                                                             |                                                                                |                                                                                                                                                                                                                           |    |    |    |
|---------------------------------------------------------------------------------------------------------------------|------|------------------------------|-------------------|---------------------------------------|----------------------------------|---------------------------------------------|---------------------------------------------------------------------------------------------------------------------------------------------------------------------------------------------|--------------------------------------------------------------------------------|---------------------------------------------------------------------------------------------------------------------------------------------------------------------------------------------------------------------------|----|----|----|
| of residents of selected communities in Ibadan, Nigeria; Gree et al.                                                |      |                              |                   |                                       |                                  |                                             |                                                                                                                                                                                             |                                                                                |                                                                                                                                                                                                                           |    |    |    |
| <b>The Association between Types of Ambient PM2.5 and Under-Five and Maternal Mortality in Africa; Owili et al.</b> | 2017 | All African countries        | 2000-2015         | Ecological study                      | Not given                        | Under-five mortality and Maternal mortality | Annual PM2.5 pollution type (biomass, anthropogenic, dust, mixture) as derived from monthly spectral aerosol optical depth satellite data to estimate concentrations for African sub-region | Generalized Linear and Additive Mixed-Effect models with Poisson link function | Biomass PM2.5 - ↑ Under-5 deaths and Maternal deaths; Anthropogenic PM2.5 - ↑ Under-5 deaths and Maternal deaths; Dust PM2.5 - ↓ Under-5 deaths and Maternal deaths; Mixture PM2.5 - ↓ Under-5 deaths and Maternal deaths | No | No | No |
| <b>Outdoor Air Pollution, Preterm Birth, and Low Birth</b>                                                          | 2014 | Democratic Republic of Congo | Sept. 2004 – Marc | Cross-sectional health facility study | N=192,900 with n=35,125 from SSA | Low birth weight and Preterm birth          | Seasonally adjusted long-term                                                                                                                                                               | Generalized estimating equation                                                | PM2.5 - ↑ low birth weight                                                                                                                                                                                                | No | No | No |

|                                                                                                                                                                   |      |                         |                                  |                                                  |                                                              |                                                                     |                                                                                                                                         |                                                                                                           |                                                                                                                                                                                    |                                     |    |    |
|-------------------------------------------------------------------------------------------------------------------------------------------------------------------|------|-------------------------|----------------------------------|--------------------------------------------------|--------------------------------------------------------------|---------------------------------------------------------------------|-----------------------------------------------------------------------------------------------------------------------------------------|-----------------------------------------------------------------------------------------------------------|------------------------------------------------------------------------------------------------------------------------------------------------------------------------------------|-------------------------------------|----|----|
| <b>Weight: Analysis of the World Health Organization Global Survey on Maternal and Perinatal Health; Fleischer et al.</b>                                         |      | , Kenya, Niger, Nigeria | h 2005                           |                                                  | countries                                                    |                                                                     | average PM2.5 estimates estimated around study clinics (50-km buffers). Estimates derived from satellite data.                          | ns accounting for clinic correlation in birth outcomes                                                    |                                                                                                                                                                                    |                                     |    |    |
| <b>Interaction between ambient pollutant exposure, CD14 (-159) polymorphism and respiratory outcomes among children in Kwazulu-Natal, Durban; Makamure et al.</b> | 2017 | Durban, South Africa    | 3-weeks during different seasons | Prospective cohort at schools with questionnaire | N=71, Children ages 7 – 9 recruited from 7 different schools | Repeated measures of within-day variability in Lung function (FEV1) | Daily concentrations of NO2, NO, SO2, and PM from continuous air monitoring: NO and NO2 measured at 7 monitoring sites; SO2 at 16 sites | Linear multivariate generalized estimated equations to account for correlation of FEV1 within participant | No overall associations between pollutants and within-day lung function; Significant gene-environment interaction (CD14 polymorphisms) for NO and NO2 on within-day lung function; | Yes – By CD14 polymorphism genotype | No | No |

|  |  |  |  |  |  |  |                                                               |  |  |  |  |  |  |
|--|--|--|--|--|--|--|---------------------------------------------------------------|--|--|--|--|--|--|
|  |  |  |  |  |  |  | (including all 7 schools); PM10 at 12 sites (and each school) |  |  |  |  |  |  |
|--|--|--|--|--|--|--|---------------------------------------------------------------|--|--|--|--|--|--|
